# Supplementary material
Source: publisher site journal article supplement (https://www.dovepress.com/article/347667)
Supplement: Supplementary file 1 [file get_supplementary_file.php]

**Supplementary material**

Supplementary Table S1: Characteristics of the included studies on magnitude of risk factors VTE and quality of anticoagulant therapy in Ethiopia.

| Name first author | Year of publication | study design | Study period | clinical setting | Regional state | Sample size | Male((n) | % | Female  (n) | % |
| --- | --- | --- | --- | --- | --- | --- | --- | --- | --- | --- |
| Mulatu A, (20) | 2020 | p. cohort study | March 2018 to Aug 2018 | hospitalized in medical ward | AA and Oromia | 129 | 45 | 34.88 | 84 | 65.12 |
| Tadesse TA (21) | 2020 | R. cross-sectional | Sep1, 2018 to Feb28, 2019. | hospitalized surgical ward | AA | 155 | 77 | 49.68 | 78 | 50.32 |
| Haile L(22) | 2013 | p. cross-sectional | Feb 2011 to Oct 2012 | hospitalized in medical ward | AA | 81 | 28 | 34.57 | 53 | 65.43 |
| Liyew Z (23) | Un published | hospital-based cross sectional | Nov 1, 2019 and Oct 31, 2020 | outpatient | Amhara | 338 | 121 | 35.80 | 217 | 64.20 |
| Ahmed F (24) | 2019 | R. cross sectional | April 28 to May 3, 2017 | hospitalized in medical ward | AA | 200 | 119 | 59.50 | 81 | 40.50 |
| Masresha N (25) | 2021 | R. cross sectional | Jun 1,2016, and May 30, 2018, | outpatient | Amhara | 202 | 68 | 33.66 | 134 | 65.34 |
| Fenta TG (26) | 2017 | R. cross sectional | Jan, 2011 to Jan, 2012 | outpatient | AA | 360 | 127 | 35.28 | 233 | 64.72 |
| Ayalew MB(27) | 2018 | cross sectional | June 1 to August 31, 2017. | hospitalized in medical ward | Amhara | 206 | 98 | 47.57 | 108 | 53.43 |
| Tadesse F (28) | 2016 | R. cross sectional | July 2012 to June 2013 | hospitalized in medical ward | AA | 91 | 38 | 41.76 | 53 | 58.24 |
| Teklay G (29) | 2014 | p.cohort | from January to October 2013 | hospitalized in medical ward | Tigray | 133 | 55 | 41.35 | 78 | 58.65 |

| Mengistu G (30) | 2017 | R.Chart review | Mar 30, 2014 to Mar 30, 2016. | hospitalized in medical ward | Harar | 87 | 40 | 45.98 | 47 | 54.02 |
| --- | --- | --- | --- | --- | --- | --- | --- | --- | --- | --- |
| Negash N (35) | Un published | cross-sectional | Feb, 2019-Aug, 2019 | hospitalized in medical ward | AA | 200 | 89 | 44.5 | 111 | 55.50 |
| Total |  |  |  |  |  | 2182 | 905 | 41.48 | 1277 | 58.52 |

p= prospective; R= retrospective; AA=Addis Ababa; VTE= Venous thromboembolism
